# Supplementary material for: Controllable synthesis and magnetotransport properties of Cd3As2Dirac semimetal nanostructures
Source: Royal Society of Chemistry journal article supplement (doi:10.1039/c7ra02847d), 2017-01-01
Supplement: c7ra02847d1.pdf [file c7ra02847d1.pdf]

## Supplementary Information

### Controllable synthesis and magnetotransport properties of $\text{Cd}_3\text{As}_2$ Dirac semimetal nanostructures

Kang Zhang,<sup>†a</sup> Haiyang Pan,<sup>†b</sup> Minhao Zhang,<sup>a</sup> Zhongxia Wei,<sup>b</sup> Ming Gao,<sup>a</sup> Fengqi Song,<sup>\*b</sup> Xuefeng Wang<sup>\*a</sup> and Rong Zhang<sup>a</sup>

<sup>a</sup> National Laboratory of Solid State Microstructures, Collaborative Innovation Center of Advanced Microstructures, School of Electronic Science and Engineering, Nanjing University, Nanjing, Jiangsu 210093, P. R. China. E-mail: xfwang@nju.edu.cn.

<sup>b</sup> National Laboratory of Solid State Microstructures, Collaborative Innovation Center of Advanced Microstructures, Collaborative Innovation Center of Advanced Microstructures, College of Physics, Nanjing University, Nanjing, Jiangsu 210093, P. R. China. E-mail: songfengqi@nju.edu.cn.

<sup>†</sup>These authors contributed equally to this work.

**S1:** Powder X-ray diffraction (XRD) patterns of  $\text{Cd}_3\text{As}_2$  nanowires and nanobelts are shown in Fig. S1 (a) and (b), respectively. They both show the good agreement with the theoretical peak positions of  $\text{Cd}_3\text{As}_2$ , which has an  $I41cd$  symmetry structure (red lines). The powder samples are collected from grinding the grown  $\text{Cd}_3\text{As}_2$  nanostructures on Si substrates.

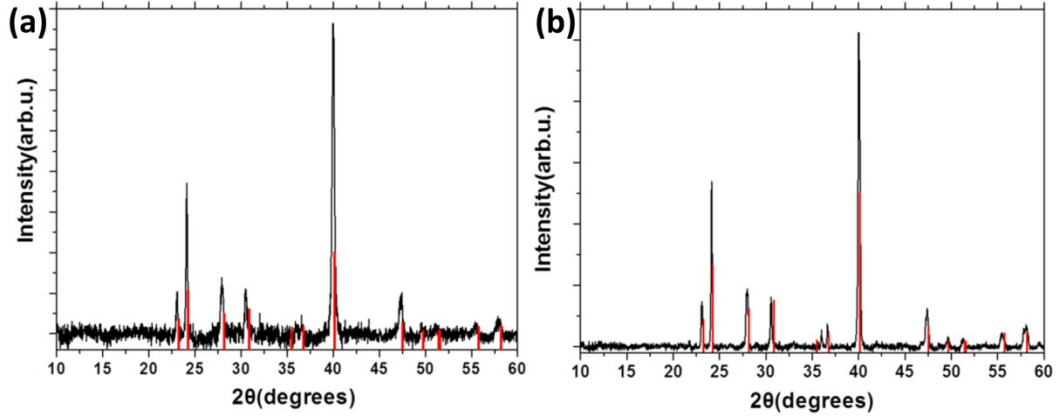

**Fig. S1.** The X-ray diffraction pattern from (a)  $\text{Cd}_3\text{As}_2$  nanowires powder and (b)  $\text{Cd}_3\text{As}_2$  nanobelts powder. The red lines show the theoretical positions of  $\text{Cd}_3\text{As}_2$  (space group  $I41cd$ ) peaks.

**S2:** To give more information on the magnetoresistance (MR), Figure 4(c), (f) and Figure 5(c) are drawn as  $\text{MR}(\%) = (R(B) - R(0T)) \times 100 / R(0T)$ . Figure S2(a), (b), (c) display the MR curves of  $\text{Cd}_3\text{As}_2$  nanobelt, zigzag nanobelt and nanowire, respectively, and Figure S2(d), (e), (f) is the temperature dependence of MR at 14 T.

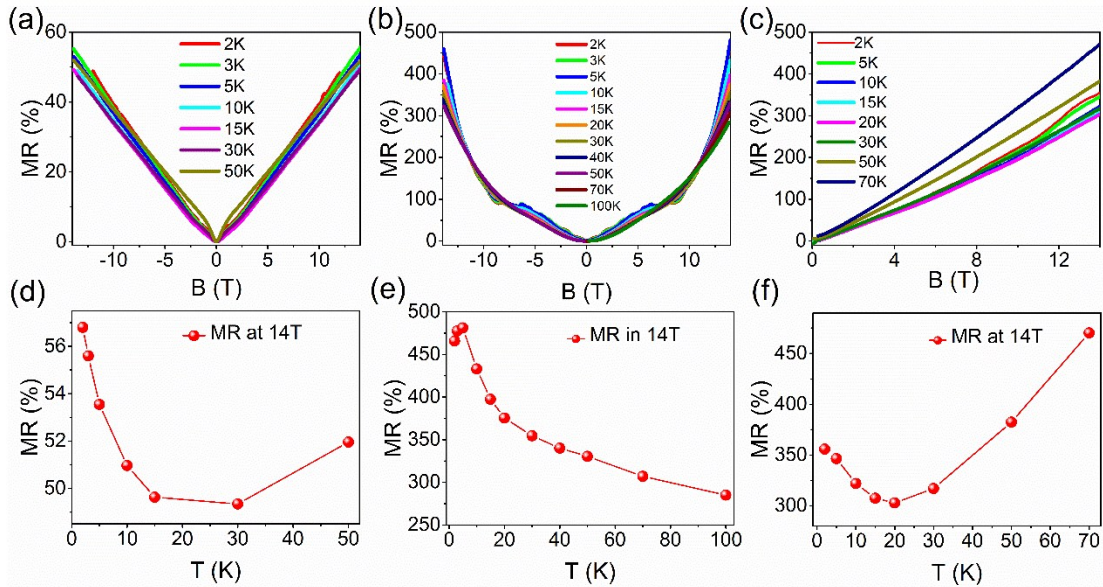

**Fig. S2.** The MR curves and the corresponding temperature dependence at 14 T. (a) and (d) are for the nanobelt device. (b) and (e) are for the zigzag nanobelt device. (c) and (f) are for the nanowire device.

**S3:** We have measured other nanodevice to study the magnetoresistance of  $\text{Cd}_3\text{As}_2$  nanostructures. As displayed in Fig. S3, another nanobelt also exhibits the insulating behavior and unsaturated linear magnetoresistance. This confirms the reality of insulating behavior and magnetoresistance of our nanostructures.

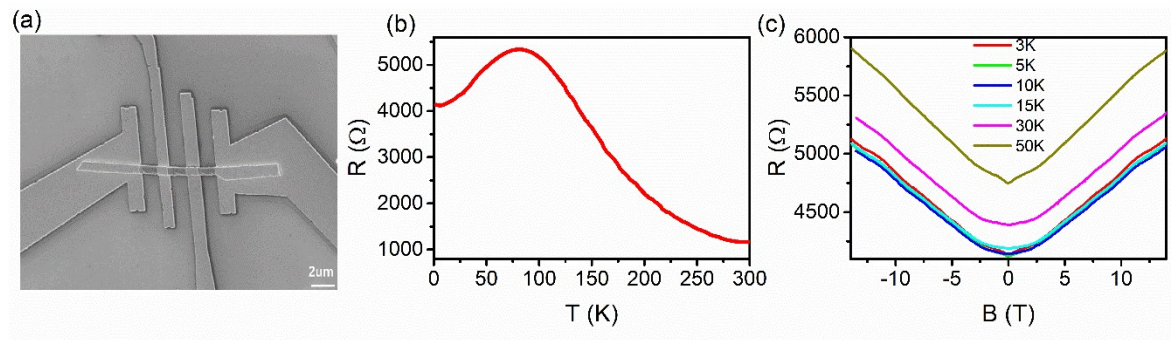

**Fig. S3.** (a) The SEM image of the nanobelt device. (b) Its temperature-dependent resistance curve. (c) Its magnetoresistance measured at various temperatures in perpendicular magnetic field.
